# Supplementary material for: The neuronal receptor tyrosine kinase Alk is a target for longevity
Source: Aging Cell. 2020 Apr 15;19(5):e13137. doi: 10.1111/acel.13137 (PMC7253064; doi:10.1111/acel.13137)
Supplement: Supplementary file 1 — Fig S1‐S10 [file ACEL-19-e13137-s001.pdf]

## **Supplementary Figures for**

### **The neuronal receptor tyrosine kinase Alk is a target for longevity**

Nathaniel S. Woodling<sup>1</sup>, Benjamin Aleyakpo<sup>1</sup>, Miranda Claire Dyson<sup>1</sup>, Lucy J. Minkley<sup>1</sup>, Arjunan Rajasingam<sup>1</sup>, Adam J. Dobson<sup>1,3</sup>, Kristie H. C. Leung<sup>1</sup>, Simona Pomposova<sup>1</sup>, Matías Fuentealba<sup>1</sup>, Nazif Alic<sup>1</sup>, and Linda Partridge<sup>1,2</sup>

<sup>1</sup> Institute of Healthy Ageing and Department of Genetics, Evolution and Environment, University College London, Darwin Building, Gower Street, London WC1E 6BT, United Kingdom

<sup>2</sup> Max Planck Institute for Biology of Ageing, Joseph-Stelzmann-Strasse 9b, 50931 Cologne, Germany

<sup>3</sup> Current Address: Institute of Molecular, Cell and Systems Biology, College of Medical, Veterinary and Life Sciences, Davidson Building, University of Glasgow, Glasgow, G12 8QQ, United Kingdom

Correspondence should be addressed to:

Linda Partridge  
Institute of Healthy Ageing  
University College London  
Tel: (+44) 020 7679 4380  
l.partridge@ucl.ac.uk

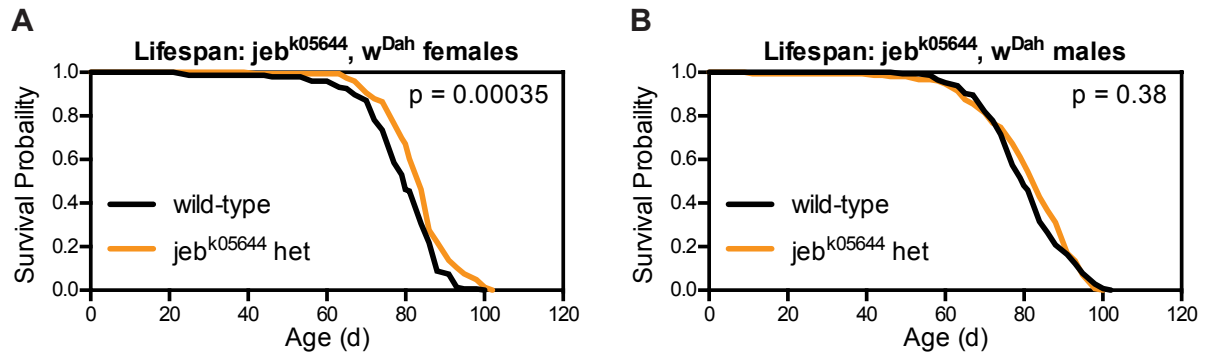

**Supplementary Figure 1. Heterozygous loss of *jeb* reproducibly extends lifespan in female but not male flies.** (A) Survival curves showed extended lifespan for female  $w^{Dah};jeb^{k05644}/+$  flies compared to their  $w^{Dah};+/+$  siblings. (B) Survival curves showed no significant change in lifespan for male  $w^{Dah};jeb^{k05644}/+$  flies compared to their  $w^{Dah};+/+$  siblings. For all survival experiments,  $n > 145$  deaths counted per condition; p values are from log-rank tests versus the wild-type condition.

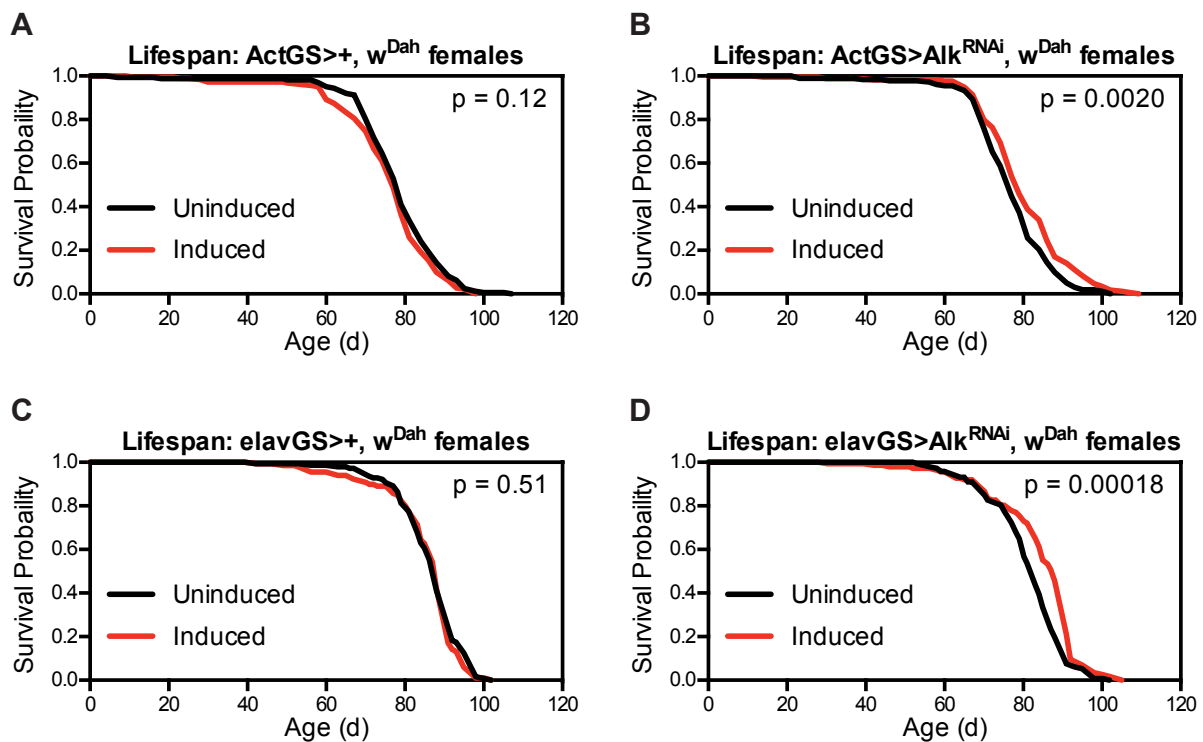

**Supplementary Figure 2. RNAi knock-down of *Alk* ubiquitously or in neurons reproducibly extends lifespan.** (A) Survival curves showed no significant change in lifespan for female w<sup>Dah</sup>;Act-GS/+ flies treated with RU-486 (200μM) from 2 days of age compared to sibling flies of the same genotype treated with vehicle control food. (B) Survival curves showed extended lifespan for female w<sup>Dah</sup>;UAS-Alk<sup>RNAi</sup>/w<sup>Dah</sup>;Act-GS/+ flies treated with RU-486 (200μM) from 2 days of age compared to sibling flies of the same genotype treated with vehicle control food. (C) Survival curves showed no significant change in lifespan for female w<sup>Dah</sup>;elav-GS<sup>Tricoire</sup>/+ flies treated with RU-486 (200μM) from 2 days of age compared to sibling flies of the same genotype treated with vehicle control food. (D) Survival curves showed extended lifespan for female w<sup>Dah</sup>;UAS-Alk<sup>RNAi</sup>/w<sup>Dah</sup>;elav-GS<sup>Tricoire</sup>/+ flies treated with RU-486 (200μM) from 2 days of age compared to sibling flies of the same genotype treated with vehicle control food. For all survival experiments, n>110 deaths counted per condition; p values are from log-rank tests versus the vehicle-treated (uninduced) group.

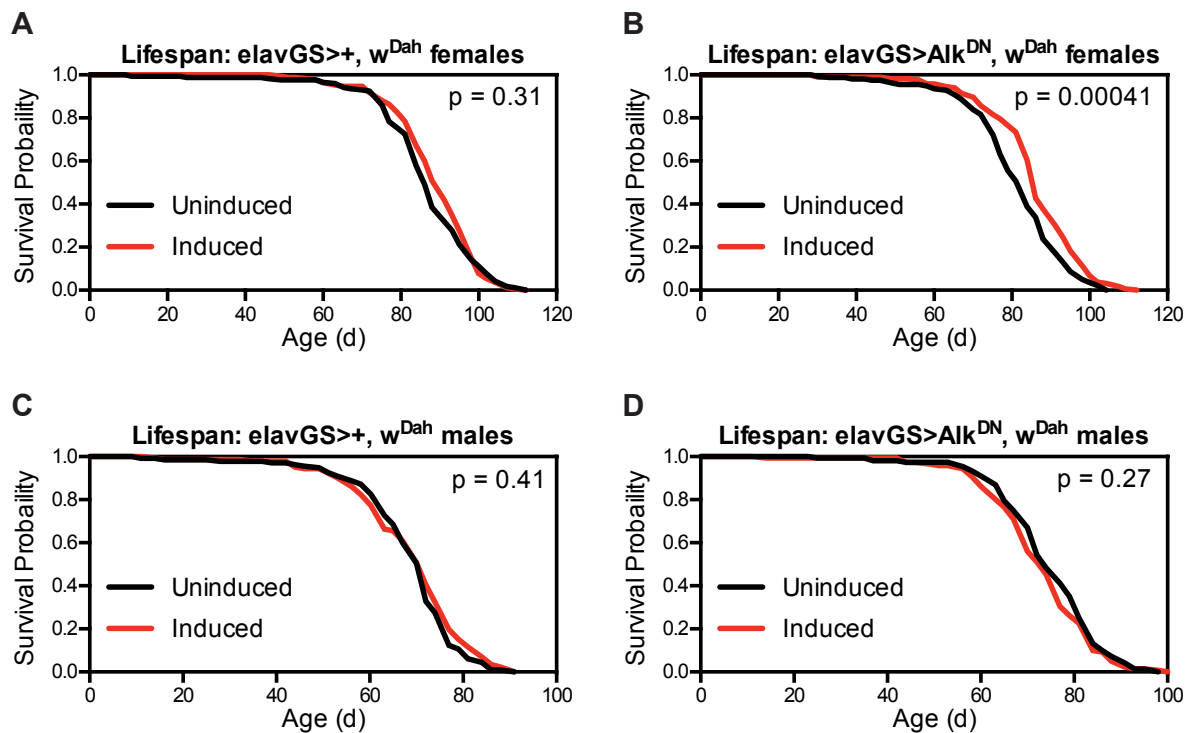

**Supplementary Figure 3. Expression of dominant-negative *Alk* in neurons reproducibly extends lifespan in female but not male flies.** (A) Survival curves showed no significant change in lifespan for female *w<sup>Dah</sup>;elav-GS<sup>301</sup>/+* flies treated with RU-486 (200μM) from 2 days of age compared to sibling flies of the same genotype treated with vehicle control food. (B) Survival curves showed extended lifespan for female *w<sup>Dah</sup>;UAS-Alk<sup>DN</sup>/elav-GS<sup>301</sup>* flies treated with RU-486 (200μM) from 2 days of age compared to sibling flies of the same genotype treated with vehicle control food. (C) Survival curves showed no significant change in lifespan for male *w<sup>Dah</sup>;elav-GS<sup>301</sup>/+* flies treated with RU-486 (200μM) from 2 days of age compared to sibling flies of the same genotype treated with vehicle control food. (D) Survival curves showed no significant change in lifespan for male *w<sup>Dah</sup>;UAS-Alk<sup>DN</sup>/elav-GS<sup>301</sup>* flies treated with RU-486 (200μM) from 2 days of age compared to sibling flies of the same genotype treated with vehicle control food. For all survival experiments, *n*>115 deaths counted per condition; *p* values are from log-rank tests versus the vehicle-treated (uninduced) group.

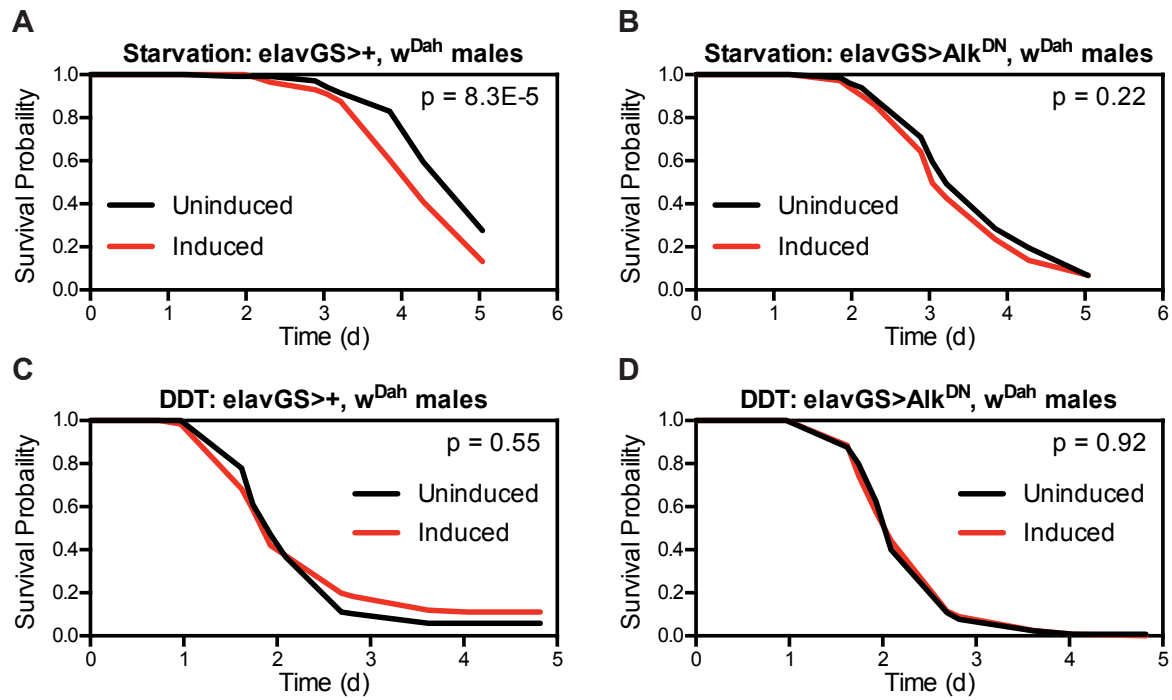

**Supplementary Figure 4. Expression of dominant-negative *Alk* in neurons does not improve resistance to starvation or resistance to the xenobiotic toxin DDT in male flies.** (A-B) Survival curves in starvation experiments started at 14 days of age showed (A) decreased survival for male *w<sup>Dah</sup>;elav-GS<sup>301</sup>/+* flies and (B) no significant change in survival for male *w<sup>Dah</sup>;UAS-Alk<sup>DN</sup>/elav-GS<sup>301</sup>* flies treated with RU-486 (200μM) from 2 days of age compared to sibling flies of the same genotype treated with vehicle control food. (C-D) Survival curves in DDT (0.03%) experiments started at 14 days of age showed (C) no significant change in survival for male *w<sup>Dah</sup>;elav-GS<sup>301</sup>/+* flies and (D) no significant change in survival for male *w<sup>Dah</sup>;UAS-Alk<sup>DN</sup>/elav-GS<sup>301</sup>* flies treated with RU-486 (200μM) from 2 days of age compared to sibling flies of the same genotype treated with vehicle control food. For all survival experiments,  $n > 100$  deaths counted per condition; p values are from log-rank tests versus the vehicle-treated (uninduced) group.

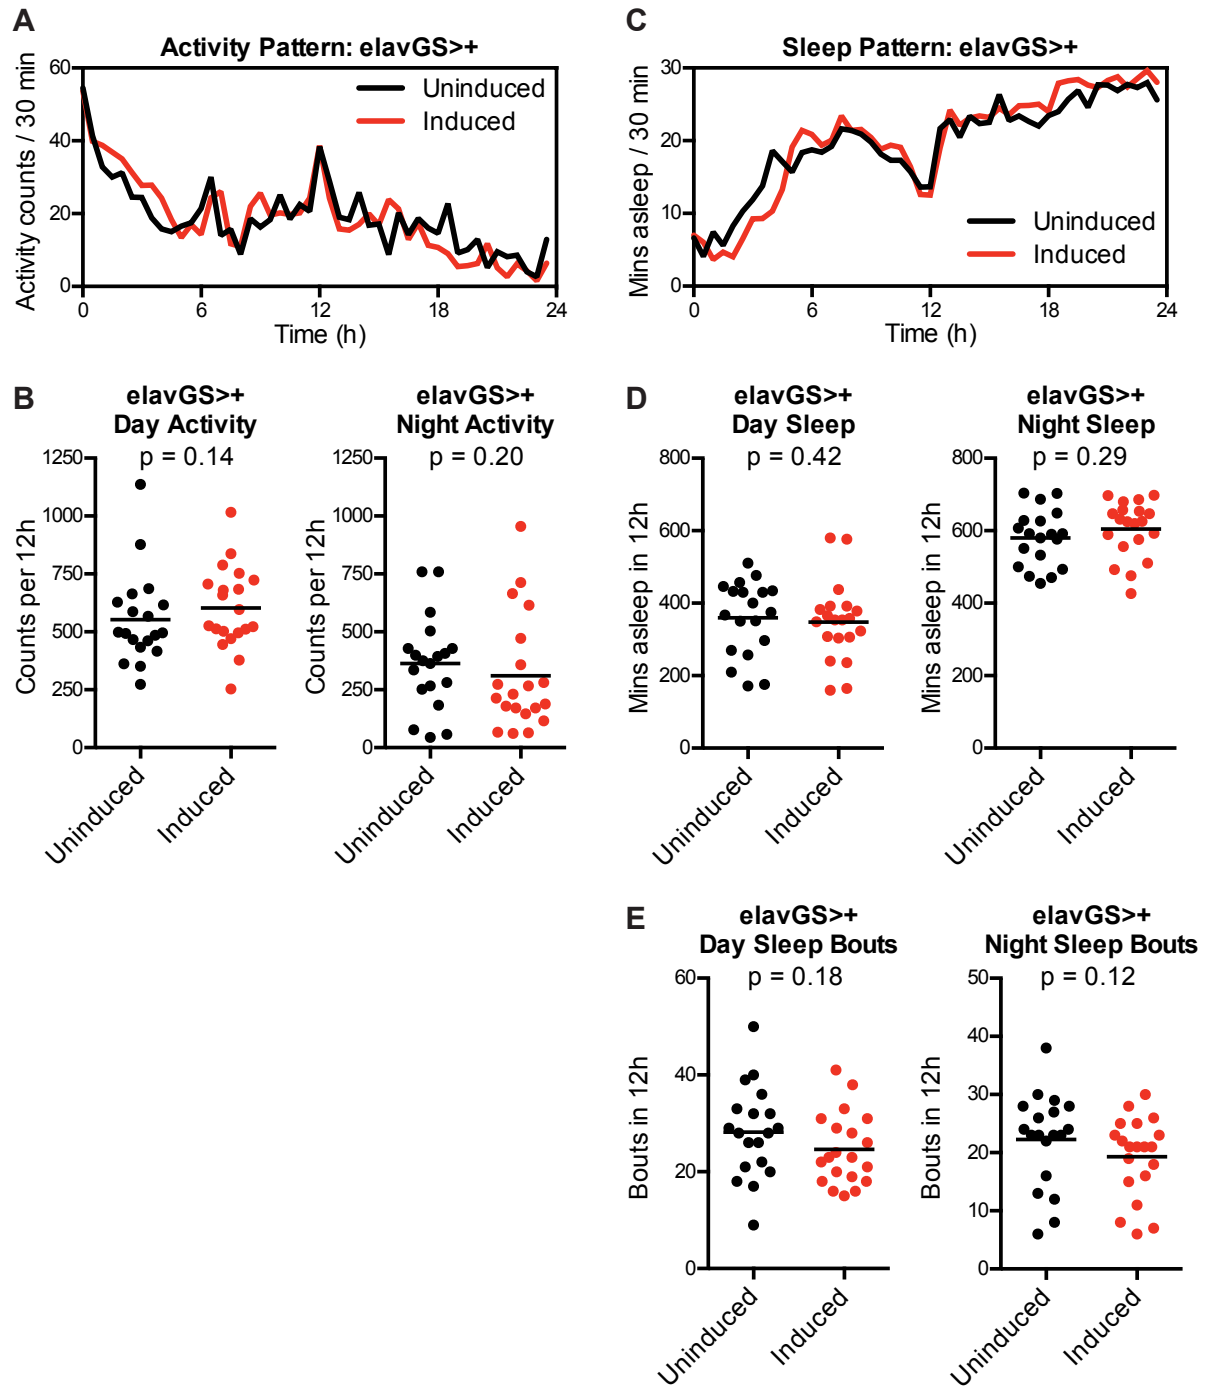

**Supplementary Figure 5. Driver-alone *elavGS/+* flies show no change in activity or sleep patterns with RU-486 treatment.** (A) Activity traces and (B) quantification of day and night activity counts from mated female flies at 15 days of age showed no significant change in activity for  $w^{Dah};elav-GS^{301/+}$  flies treated with RU-486 (200 $\mu$ M) from 2 days of age compared to sibling flies of the same genotype treated with vehicle control food. (C) Sleep traces, (D) quantification of day and night sleep, and (E) quantification of the number of day and night sleep bouts from mated female flies at 15 days of age showed no significant change in activity for  $w^{Dah};elav-GS^{301/+}$  flies treated with RU-486 (200 $\mu$ M) from 2 days of age compared to sibling flies of the same genotype treated with vehicle control food.  $n=19-20$  individual flies per condition;  $p$  values are from Mann-Whitney tests versus the vehicle-treated (uninduced) group.

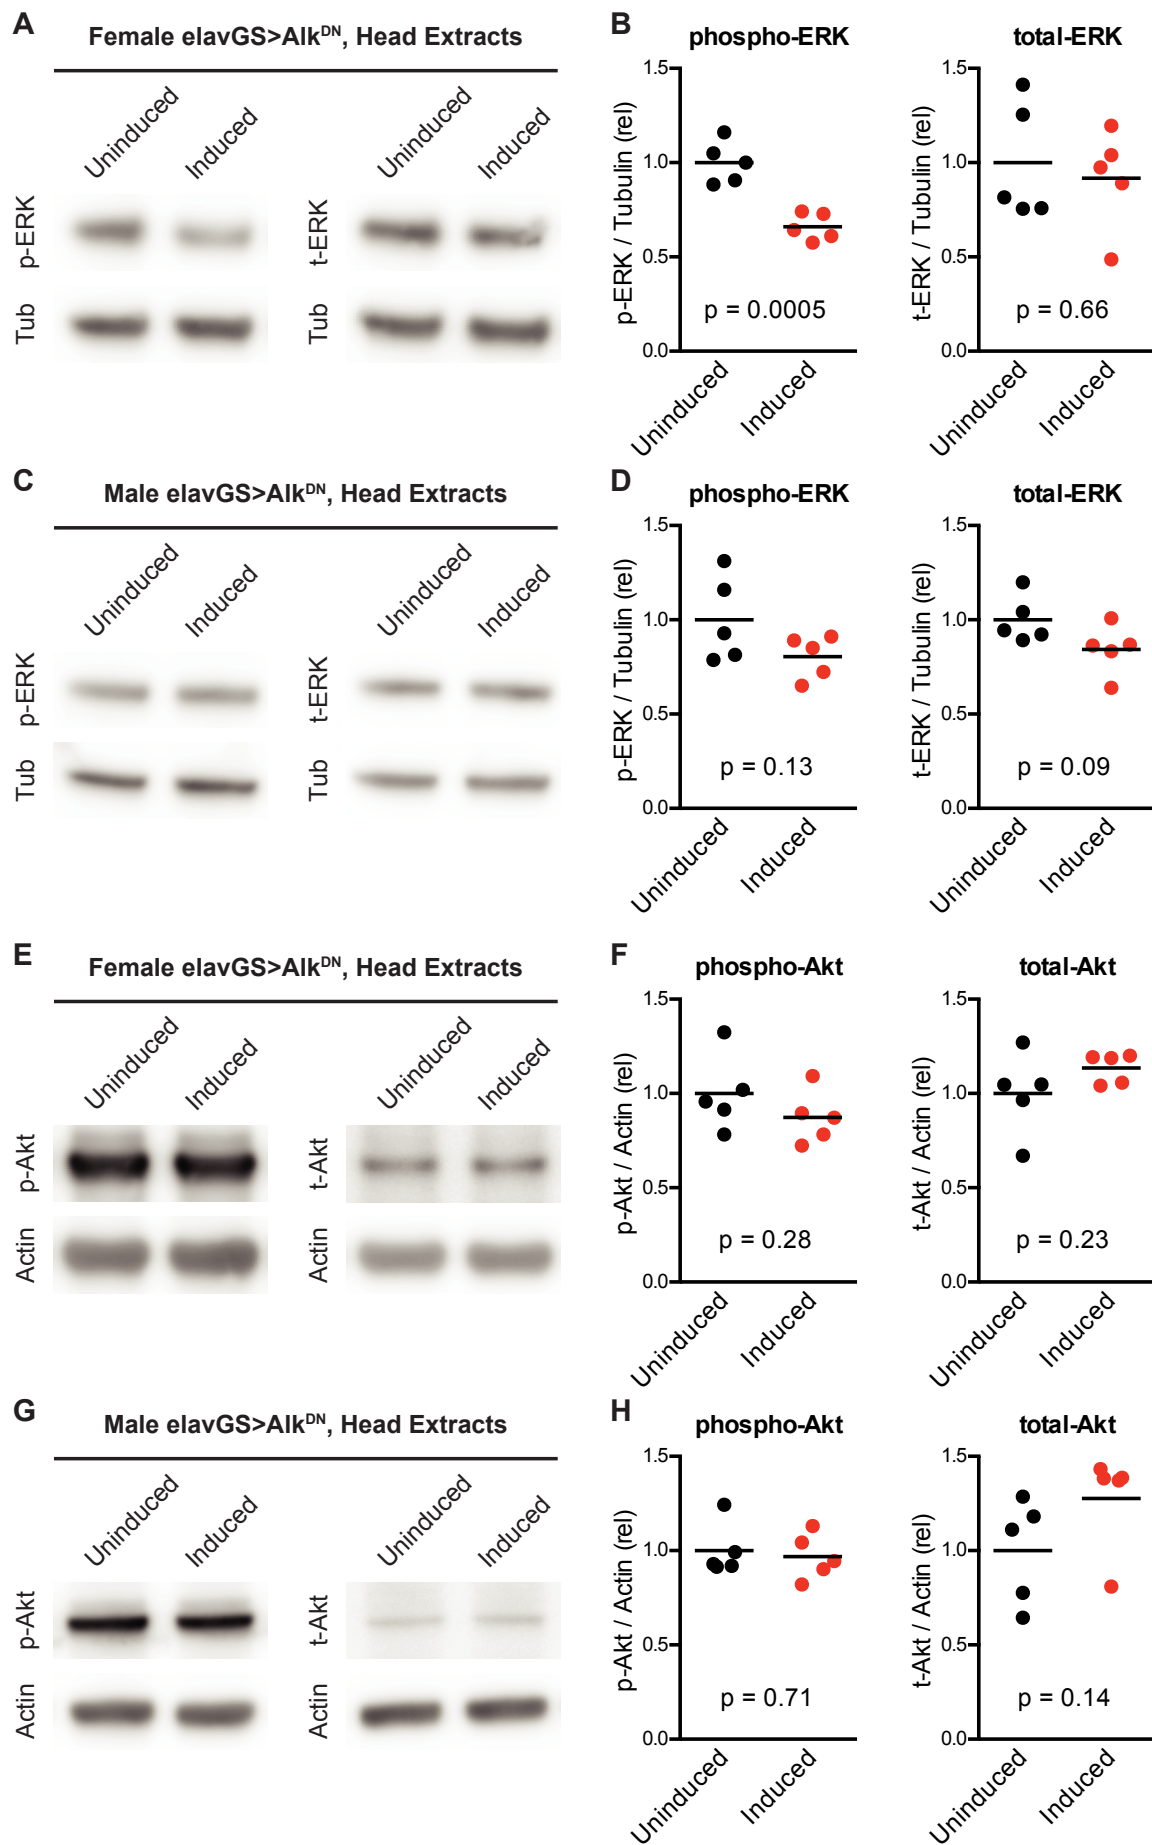

**Supplementary Figure 6 (previous page). Expression of dominant-negative *Alk* in neurons reduces Erk phosphorylation in females but not males, while not significantly affecting Akt phosphorylation.** (A-B) Western blots from head extracts showed decreased levels of phosphorylated Erk and no significant change in the level of total Erk in female  $w^{Dah};;UAS-Alk^{DN}/elav-GS^{301}$  flies given food containing the inducing drug RU-486 (200 $\mu$ M) from 2 to 10 days of age compared to sibling flies of the same genotype treated with vehicle control food. (C-D) Western blots from head extracts showed no significant change in the levels of phosphorylated Erk or total Erk in male  $w^{Dah};;UAS-Alk^{DN}/elav-GS^{301}$  flies given food containing the inducing drug RU-486 (200 $\mu$ M) from 2 to 10 days of age compared to sibling flies of the same genotype treated with vehicle control food. (E-F) Western blots from head extracts showed no significant change in the levels of phosphorylated Akt (Thr342) or total Akt in female  $w^{Dah};;UAS-Alk^{DN}/elav-GS^{301}$  flies given food containing the inducing drug RU-486 (200 $\mu$ M) from 2 to 10 days of age compared to sibling flies of the same genotype treated with vehicle control food. (G-H) Western blots from head extracts showed no significant change in the levels of phosphorylated Akt (Thr342) or total Akt in male  $w^{Dah};;UAS-Alk^{DN}/elav-GS^{301}$  flies given food containing the inducing drug RU-486 (200 $\mu$ M) from 2 to 10 days of age compared to sibling flies of the same genotype treated with vehicle control food. n=5 biological replicates of 8 heads per replicate for each condition; p values are from unpaired t-tests between groups.

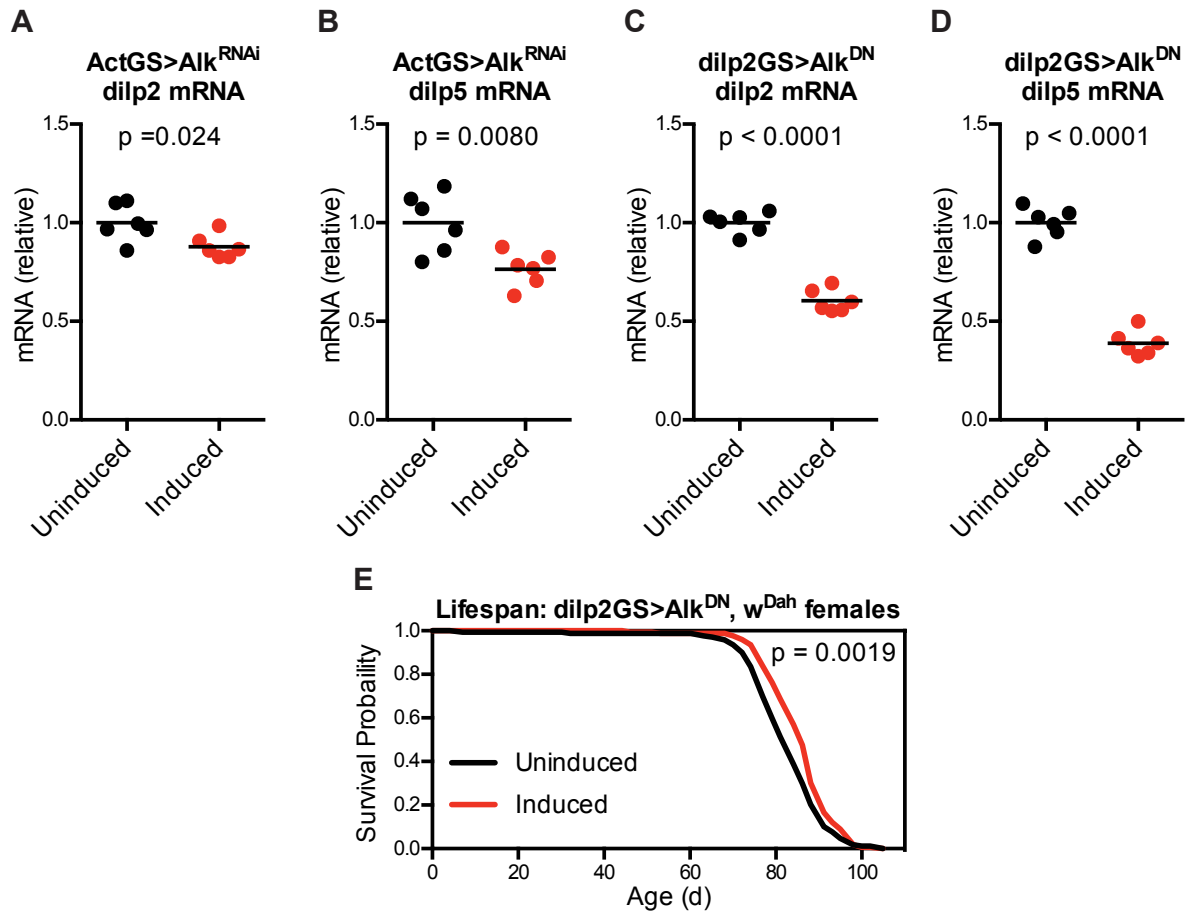

**Supplementary Figure 7. RNAi knock-down of *Alk* or *dilp*-neuron-specific expression of dominant-negative *Alk* reduces mRNA levels for *dilp2* and *dilp5* and extends lifespan. (A-B)** qPCR from head RNA showed decreased mRNA levels for *dilp2* and *dilp5* in female *w<sup>Dah</sup>;UAS-Alk<sup>RNAi</sup>/w<sup>Dah</sup>;Act-GS/+*; flies given food containing the inducing drug RU-486 (200μM) from 2 to 11 days of age compared to sibling flies of the same genotype treated with vehicle control food. **(C-D)** qPCR from head RNA showed decreased mRNA levels for *dilp2* and *dilp5* in female *w<sup>Dah</sup>;dilp2-GS/+;UAS-Alk<sup>DN</sup>/+* flies given food containing the inducing drug RU-486 (200μM) from 2 to 11 days of age compared to sibling flies of the same genotype treated with vehicle control food. n=6 biological replicates of 6 heads per replicate for each condition; p values are from unpaired t-tests between groups. **(E)** Survival curves showed extended lifespan for female *w<sup>Dah</sup>;dilp2-GS/+;UAS-Alk<sup>DN</sup>/+* flies treated with RU-486 (200μM) from 2 days of age compared to sibling flies of the same genotype treated with vehicle control food. n>165 deaths counted per condition; p value is from log-rank tests versus the vehicle-treated (uninduced) group.

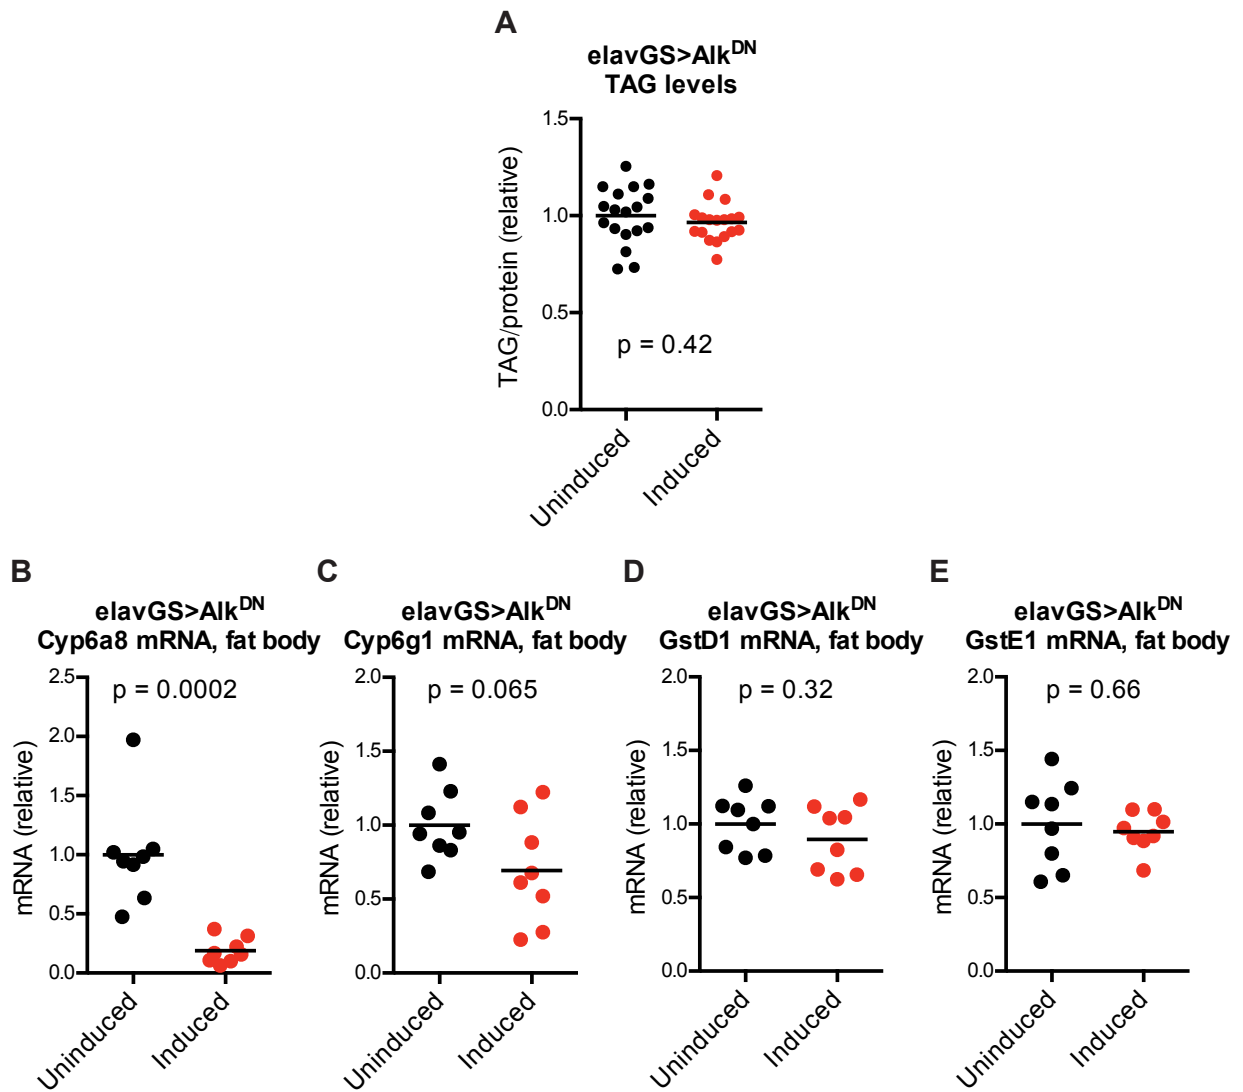

**Supplementary Figure 8. Expression of dominant-negative *Alk* in neurons does not alter TAG levels but reduces mRNA levels for *Cyp6a8* in abdominal fat bodies.** (A) Triglyceride (TAG) quantification from whole flies showed no change in TAG levels for female *w<sup>Dah</sup>::UAS-Alk<sup>DN</sup>/elav-GS<sup>301</sup>* flies given food containing the inducing drug RU-486 (200μM) from 2 to 17 days of age compared to sibling flies of the same genotype treated with vehicle control food. n=18 individual flies for each condition; p values are from unpaired t-tests between groups. (B-E) qPCR from abdominal fat body RNA showed decreased mRNA levels for *Cyp6a8*, a trend towards decreased mRNA levels for *Cyp6g1*, and no change in mRNA levels for *Gstd1* and *Gste1* in female *w<sup>Dah</sup>::UAS-Alk<sup>DN</sup>/elav-GS<sup>301</sup>* flies given food containing the inducing drug RU-486 (200μM) from 2 to 18 days of age compared to sibling flies of the same genotype treated with vehicle control food. n=8 biological replicates of 4 abdominal carcasses per replicate for each condition; p values are from unpaired t-tests between groups.

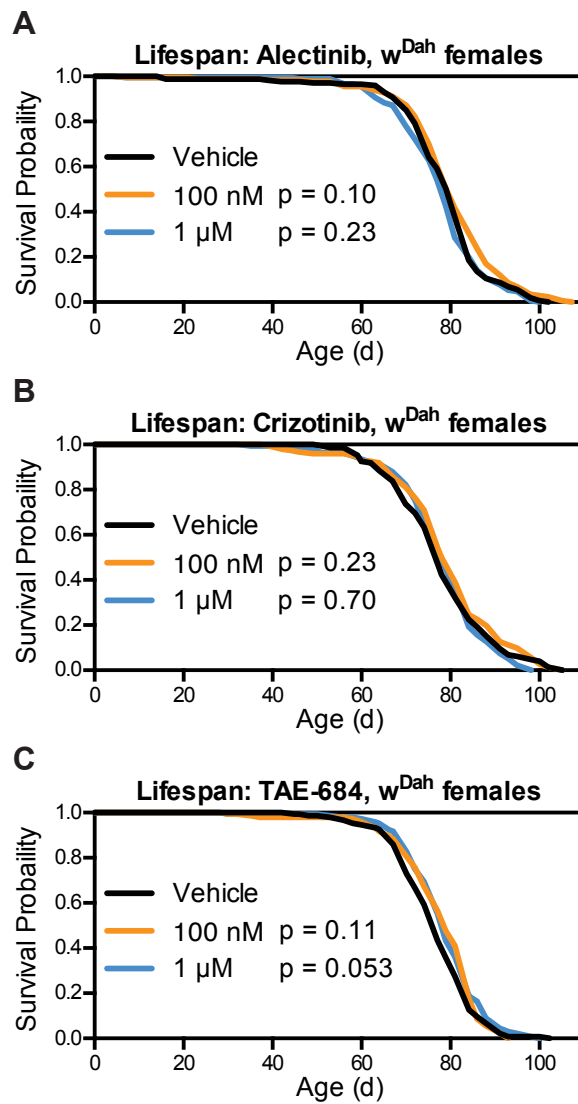

**Supplementary Figure 9. The Alk inhibitors Alectinib, Crizotinib, and TAE-684 do not significantly extend lifespan at doses of 100nM or 1 $\mu$ M.** Survival curves showed no significant change in lifespan for female  $w^{Dah}$  flies treated with (A) Alectinib (100nM or 1 $\mu$ M), (B) Crizotinib (100nM or 1 $\mu$ M), or (C) TAE-684 (100nM or 1 $\mu$ M) from 2 days of age compared to sibling flies of the same genotype treated with vehicle control food. Note that the vehicle control lifespan curves are the same as in Figure 7A-C, as these experiments were run in parallel. For all survival experiments,  $n > 130$  deaths counted per condition;  $p$  values are from log-rank tests versus the vehicle-treated group.

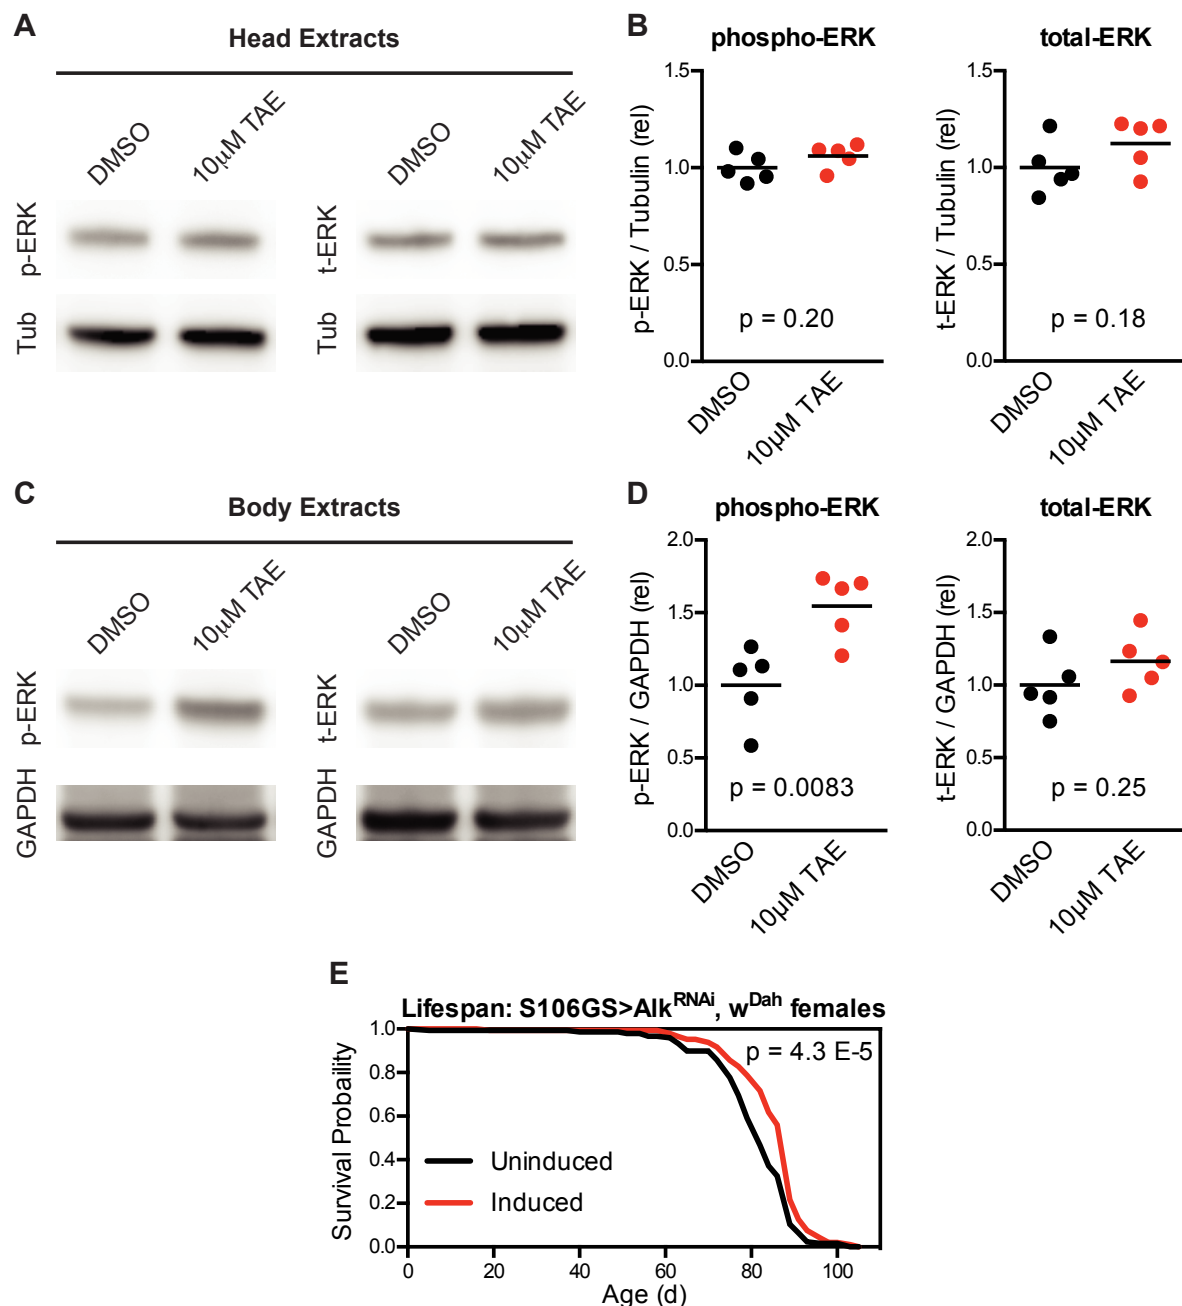

**Supplementary Figure 10. Treatment with the Alk inhibitor TAE-684 alters Erk phosphorylation in body extracts, and RNAi knock-down of *Alk* in the fat body and gut extends lifespan.** (A-B) Western blots from head extracts showed no significant change in the levels of phosphorylated Erk and total Erk in female *w<sup>Dah</sup>* flies treated with TAE-684 (10 $\mu$ M) from 2 to 10 days of age compared to sibling flies of the same genotype treated with vehicle control food. (C-D) Western blots from headless body extracts showed increased levels of phosphorylated Erk and no significant change in the level of total Erk in female *w<sup>Dah</sup>* flies treated with TAE-684 (10 $\mu$ M) from 2 to 10 days of age compared to sibling flies of the same genotype treated with vehicle control food. n=5 biological replicates for each condition; p values are from unpaired t-tests between groups. (E) Survival curves showed extended lifespan for female *w<sup>Dah</sup>,UAS-Alk<sup>RNAi</sup>/w<sup>Dah</sup>;S<sub>1</sub>106-GS/+*; flies treated with RU-486 (200 $\mu$ M) from 2 days of age compared to sibling flies of the same genotype treated with vehicle control food. n>130 deaths counted per condition; p value is from log-rank tests versus the vehicle-treated (uninduced) group.
